# Supplementary material
Source: Springer Nature journal article supplement (https://www.springermedizin.de/resource/supplementary/12887_2014_1136_MOESM1_ESM.pdf/9476622)
Supplement: MOESM1 [file 9476622]

**Total no. of infants diagnosed with pneumothorax**

**N = 289**

**Total excluded, N =197  
(more than one cause included)**

**Meconium stained liquor (n = 122)**

**PPV/Mechanical ventilation (n = 98)**

**Thoracocentesis/chest tube (n = 6)**

**CHD/Syndrome (n = 6)**

**Birth asphyxia (n = 5)**

**Pneumonia/ TTN (n = 5)**

**Total no. of infants included in the study**

**N = 92**

**HO**

**N =27**

**MO**

**N =35**

**RA**

**N = 30**
